# Supplementary material for: An Active Lifestyle Reinforces the Effect of a Healthy Diet on Cognitive Function: A Population-Based Longitudinal Study
Source: PubMed Central journal article supplement (PMC6163666; doi:10.3390/nu10091297), 2018-09-13
Supplement: nutrients-10-01297-s001.pdf [file nutrients-10-01297-s001.pdf]

**Table S1.** Hazard ratios (HR) and 95% confidence intervals (CI) for the associations of the Nordic Prudent Dietary Pattern (NPDP) and leisure activities with the MMSE decline to  $\leq 24$  over the average of 6 years ( $n = 1810$ ).

| Lifestyle factors              | n    | HR (95% CI)         |          |                     |          |
|--------------------------------|------|---------------------|----------|---------------------|----------|
|                                |      | Model 1*            | <i>P</i> | Model 2†            | <i>P</i> |
| <b>Adherence to NPDP</b>       |      |                     |          |                     |          |
| Low                            | 720  | Reference           |          | Reference           |          |
| Moderate-to-high               | 1503 | 0.25 (0.17 to 0.36) | <0.001   | 0.50 (0.34 to 0.73) | <0.001   |
| Moderate                       | 779  | 0.40 (0.27 to 0.60) | <0.001   | 0.64 (0.42 to 0.96) | 0.032    |
| High                           | 724  | 0.10 (0.05 to 0.21) | <0.001   | 0.25 (0.12 to 0.53) | <0.001   |
| <i>P</i> for trend             |      | 0.35 (0.26 to 0.46) | <0.001   | 0.55 (0.42 to 0.73) | <0.001   |
| <b>Physical activity</b>       |      |                     |          |                     |          |
| Low                            | 390  | Reference           |          | Reference           |          |
| Moderate-to-intense            | 1833 | 0.52 (0.35 to 0.77) | 0.001    | 0.75 (0.50 to 1.14) | 0.180    |
| Moderate                       | 1249 | 0.61 (0.40 to 0.91) | 0.015    | 0.75 (0.49 to 1.15) | 0.194    |
| Intense                        | 584  | 0.36 (0.21 to 0.60) | <0.001   | 0.75 (0.43 to 1.32) | 0.324    |
| <i>P</i> for trend             |      | 0.60 (0.46 to 0.77) | <0.001   | 0.85 (0.64 to 1.14) | 0.279    |
| <b>Mental activity</b>         |      |                     |          |                     |          |
| Low                            | 815  | Reference           |          | Reference           |          |
| Moderate-to-intense            | 1408 | 0.46 (0.31 to 0.66) | <0.001   | 0.90 (0.59 to 1.37) | 0.619    |
| Moderate                       | 842  | 0.65 (0.43 to 0.97) | 0.034    | 1.03 (0.67 to 1.60) | 0.874    |
| Intense                        | 566  | 0.20 (0.11 to 0.38) | <0.001   | 0.54 (0.27 to 1.07) | 0.078    |
| <i>P</i> for trend             |      | 0.51 (0.39 to 0.66) | <0.001   | 0.82 (0.61 to 1.10) | 0.194    |
| <b>Social activity</b>         |      |                     |          |                     |          |
| Low                            | 1349 | Reference           |          | Reference           |          |
| Moderate-to-intense            | 874  | 0.48 (0.32 to 0.72) | <0.001   | 0.68 (0.45 to 1.04) | 0.075    |
| Moderate                       | 552  | 0.47 (0.29 to 0.76) | 0.002    | 0.67 (0.41 to 1.09) | 0.109    |
| Intense                        | 322  | 0.50 (0.27 to 0.93) | 0.028    | 0.71 (0.38 to 1.32) | 0.275    |
| <i>P</i> for trend             |      | 0.63 (0.47 to 0.85) | 0.002    | 0.79 (0.59 to 1.06) | 0.121    |
| <b>Leisure activity score‡</b> |      |                     |          |                     |          |
| 0 (Inactive)                   | 614  | Reference           |          | Reference           |          |

|                    |      |                     |        |                     |       |
|--------------------|------|---------------------|--------|---------------------|-------|
| ≥1 (Active)        | 1609 | 0.39 (0.27 to 0.56) | <0.001 | 0.65 (0.45 to 0.95) | 0.027 |
| 1                  | 1269 | 0.44 (0.31 to 0.64) | <0.001 | 0.70 (0.48 to 1.03) | 0.073 |
| 2                  | 340  | 0.21 (0.10 to 0.43) | <0.001 | 0.42 (0.20 to 0.89) | 0.024 |
| <i>P</i> for trend |      | 0.45 (0.33 to 0.60) | <0.001 | 0.68 (0.50 to 0.91) | 0.011 |

Hazard ratios (95% CI) are from the parametric survival models. \* Model 1: crude. † Model 2: adjusted for age, sex, education, civil status, total calorie intake, dietary vitamin/mineral supplement use, smoking, body mass index, vascular disorders, cancer, diabetes, depression, *APOE* ε4 allele carriage, and physical, mental and social activities when applicable. ‡ Total leisure activity score was assessed as “0” if at least two of the three activity dimensions (physical, mental, social) were low, and the third one was low/moderate, “1” if two of the dimensions were moderate, and the third one was moderate/intense, and “2” if at least two of the dimensions were intense. An active lifestyle was defined if the leisure activity score was ≥1 (vs. 0 as inactive).

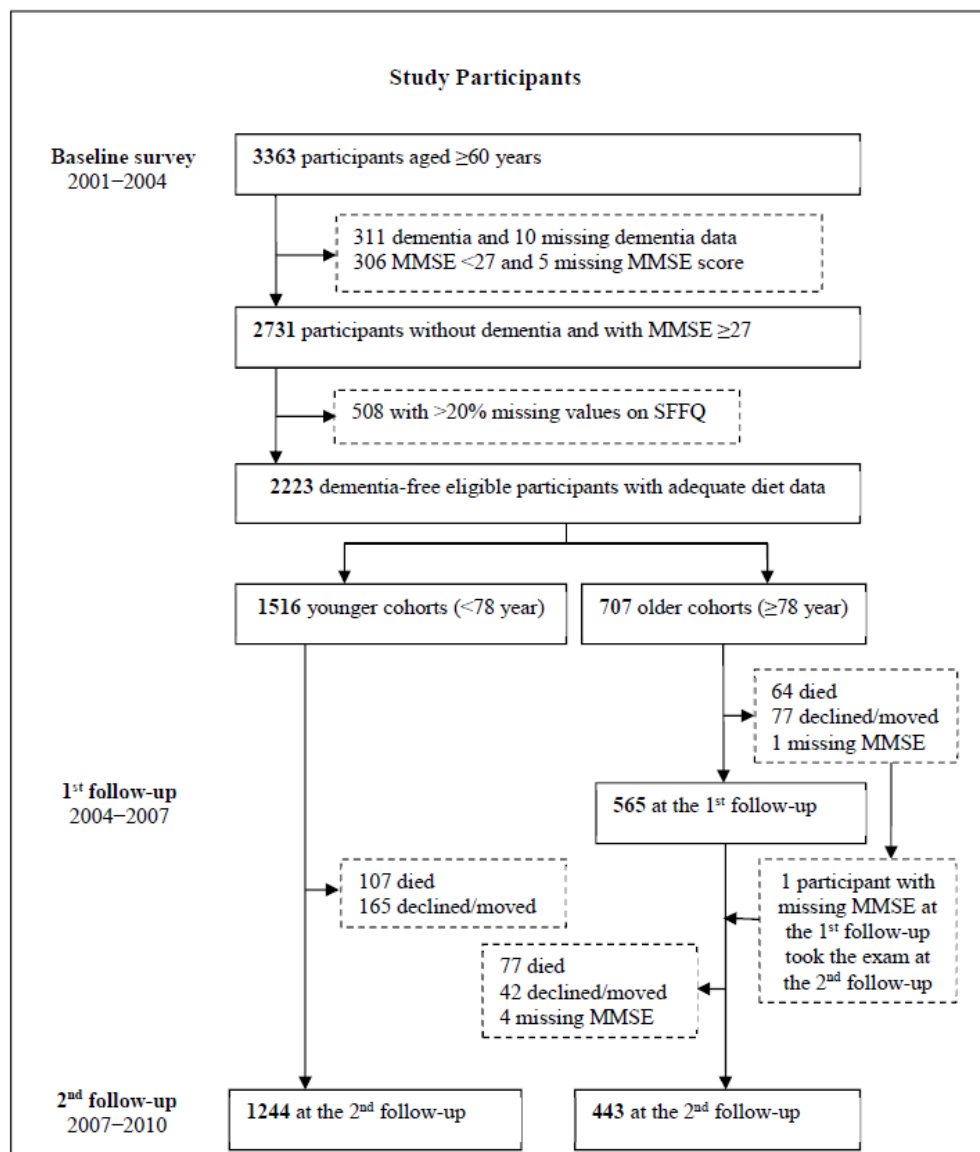

**Figure S1.** Flowchart of the study population in the Swedish National Study on Aging and Care in Kungsholmen (SNAC-K), Stockholm, Sweden. MMSE, Mini-Mental State Examination; SFFQ, semi-quantitative food frequency questionnaire.
